# Supplementary material
Source: PubMed Central journal article supplement (PMC4171053)

**Supplemental Figure 1.** Quantile-quantile plot of genome-wide association results for the anti-gliadin antibody trait: A, including the extended HLA region [genomic inflation factor (Devlin and Roeder 1999)  $\lambda = 1.008$ ]; and B, excluding the extended HLA region ( $\lambda = 1.001$ ). Devlin B, Roeder K. 1999. Genomic control for association studies. *Biometrics* 55:997-1004.

A.

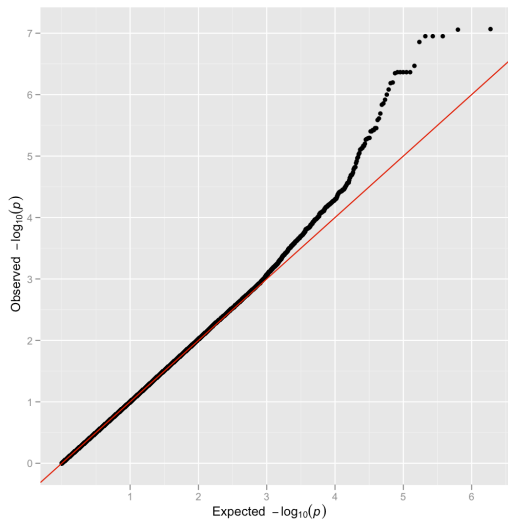

B.

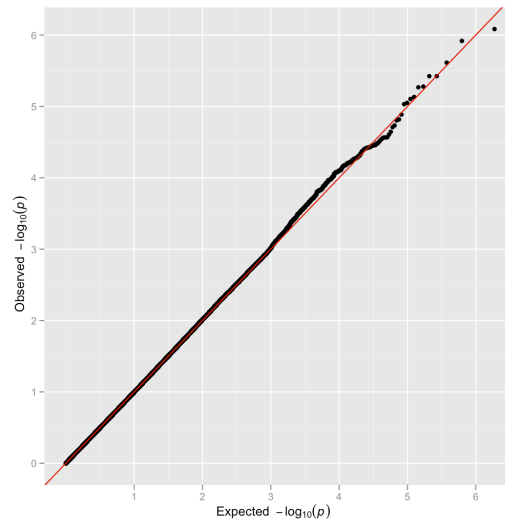

Supplement: NIHMS625000-supplement-Supp_FigureS1.pdf [file NIHMS625000-supplement-Supp_FigureS1.pdf]
