# Supplementary material
Source: PubMed Central journal article supplement (PMC4171053)

Figure S2. Genome-wide association analysis results for: (A) casein; (B) BSA-a; and (C) BSA-b.

A.

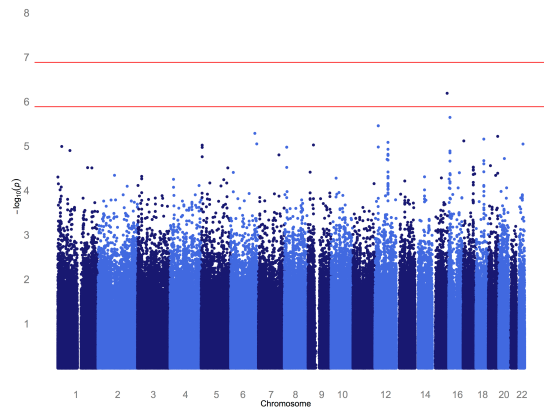

B.

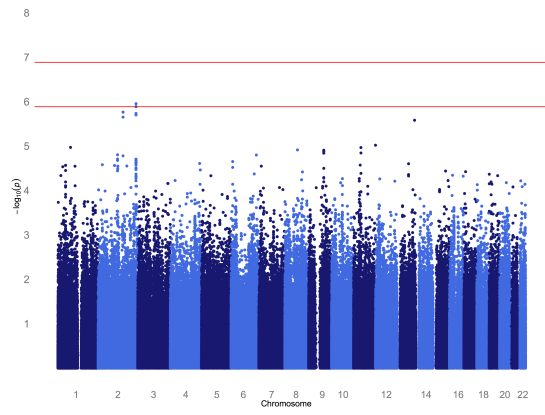

C.

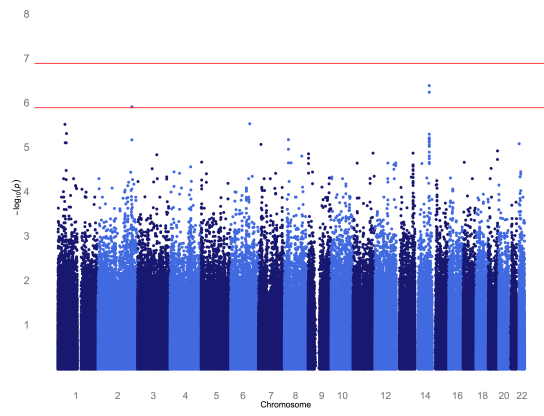

Supplement: NIHMS625000-supplement-Supp_FigureS2.pdf [file NIHMS625000-supplement-Supp_FigureS2.pdf]
